# Supplementary material for: Multifunctional hydrogel dressing based on fish gelatin/oxidized hyaluronate for promoting diabetic wound healing
Source: Royal Society of Chemistry journal article supplement (doi:10.1039/d3tb02932h), 2024-01-01
Supplement: d3tb02932h1.pdf [file d3tb02932h1.pdf]

## Supporting Information

### **Multifunctional hydrogel dressing based on fish gelatin/oxidized hyaluronate for promoting diabetic wound healing**

Dong-Joo Park<sup>a,b</sup>, Se-Chang Kim<sup>a,b</sup>, Jin-Bok Jang<sup>a,b</sup>, Bonggi Lee<sup>c</sup>, Seungjun Lee<sup>c</sup>, Bomi Ryu<sup>c</sup>,  
Jae-Young Je<sup>d</sup>, Won Sun Park<sup>e</sup> and Won-Kyo Jung<sup>a,b,f\*</sup>

<sup>a</sup> Major of Biomedical Engineering, Division of Smart Healthcare, College of Information Technology and Convergence and New-senior Healthcare Innovation Center (BK21 Plus), Pukyong National University, Busan 48513, Republic of Korea

<sup>b</sup> Marine integrated Biomedical Technology center, The National Key Research Institutes in Universities, Pukyong National University, Busan 48513, Republic of Korea

<sup>c</sup> Major of Food Science and Nutrition, Pukyong National University, Busan 48513, Republic of Korea

<sup>d</sup> Major of Human Bioconvergence, School of Smart Healthcare, Pukyong National University, Busan 48513, South Korea

<sup>e</sup> Department of Physiology, Kangwon National University School of Medicine, Chuncheon 24341, Republic of Korea

<sup>f</sup> Research Center for Marine-Integrated Bionics Technology, Pukyong National University, Busan 48513, Republic of Korea

\* Corresponding author. Won-Kyo Jung, Major of Biomedical Engineering, Division of Smart Healthcare, College of Information Technology and Convergence and New-senior Healthcare

Innovation Center (BK21 Plus), Pukyong National University, Busan 48513, Republic of Korea. E-mail: [wkjung@pknu.ac.kr](mailto:wkjung@pknu.ac.kr); Tel.: +82-051-629-5775

**Table S1.** Degree of crosslinking of hydrogels using ninhydrin assay.

| Hydrogel<br>(FG:OHy) | Name  | Degree of crosslinking<br>(%) |
|----------------------|-------|-------------------------------|
| 8:2                  | FOHI  | $71.50 \pm 0.31$              |
| 6:4                  | FOHII | $49.64 \pm 0.55$              |

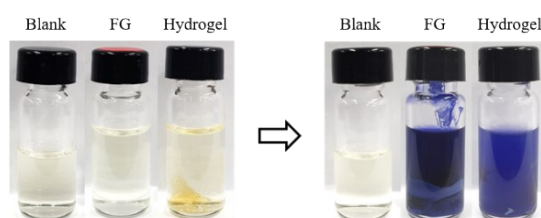

$$\% \text{ Degree of crosslinking} = \frac{\text{non crosslinked sample (FG)} - \text{crosslinked sample (Hydrogel)}}{\text{non crosslinked sample (FG)}} \times 100$$

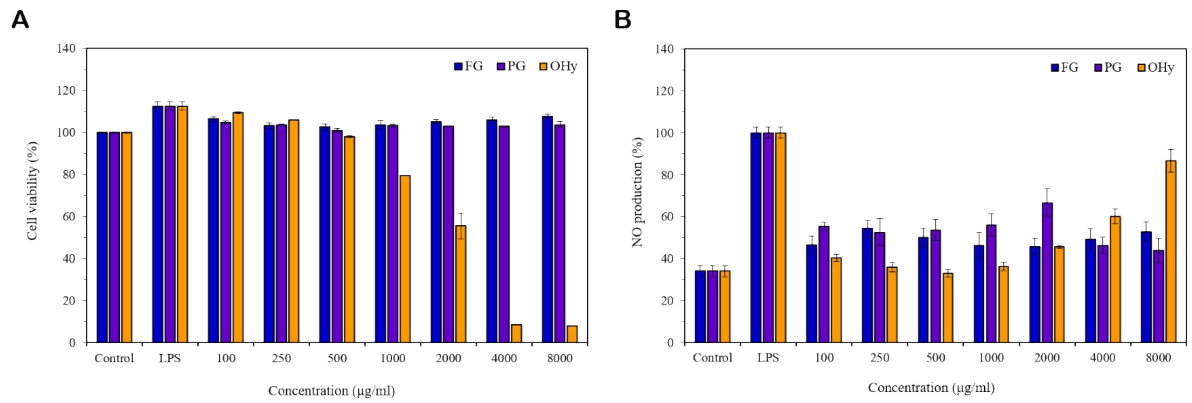

**Figure S1.** The effect on (A) cell viability and (B) NO levels after treatment with extracted fish gelatin (FG), porcine gelatin (PG) and oxidized hyaluronate (OHy) in LPS-induced RAW 264.7 macrophage.

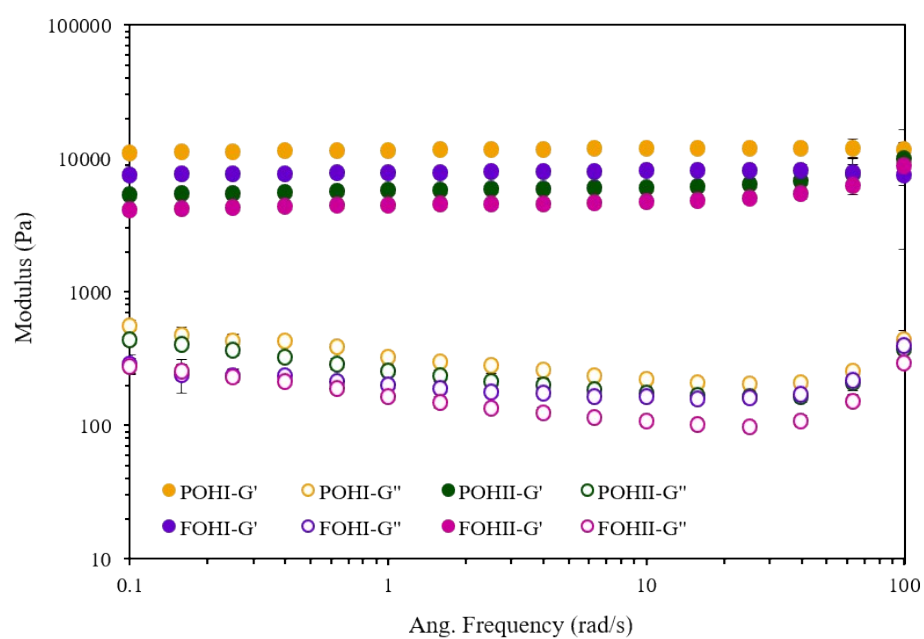

**Figure S2.** The viscoelasticity–angular frequency curve in the rheological characterization of fabricated hydrogels.

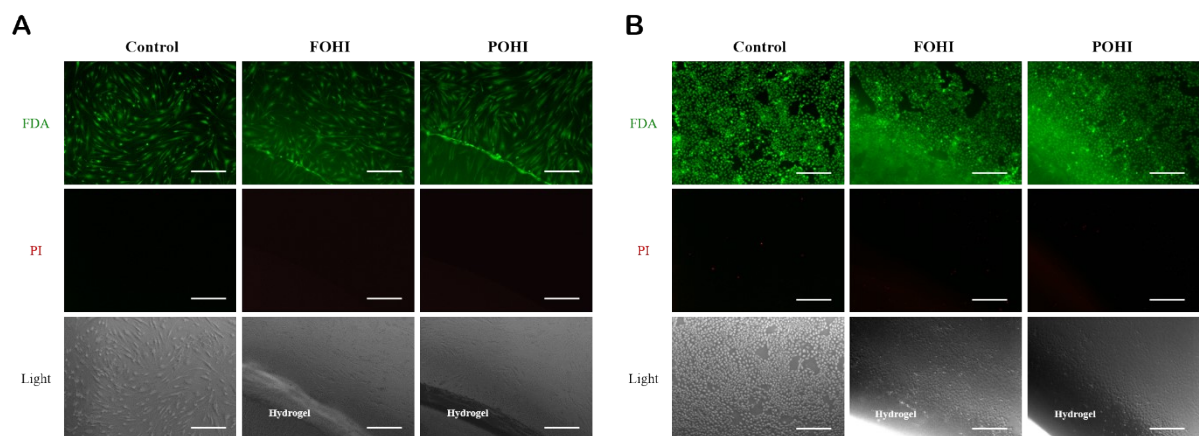

**Figure S3.** Direct contact testing of hydrogels for 24 h. Fluorescence microscopic images of Live/Dead staining of (A) HDF and (B) HaCaT cells after co-incubation of hydrogels.

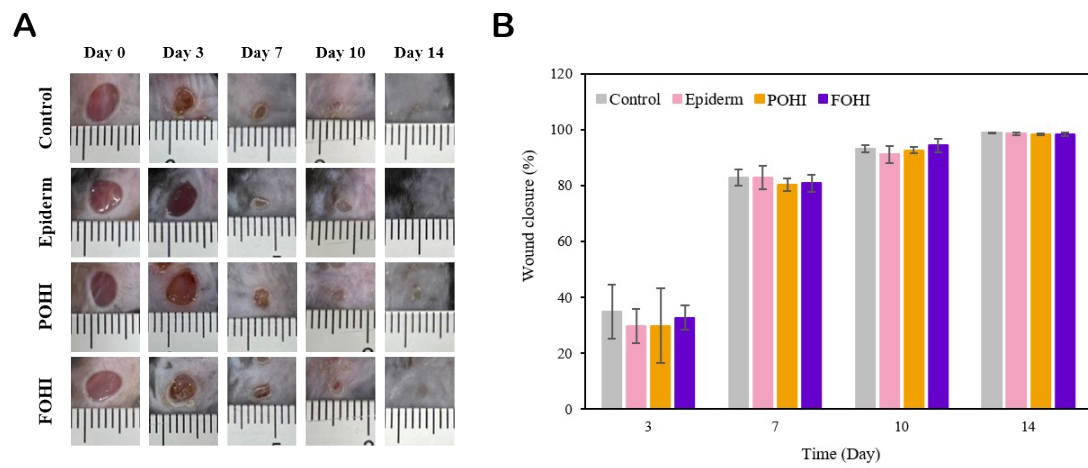

**Figure S4.** (A) Representative images of the wounds treated with or without hydrogels at day 0, 3, 7, 10 and 14 post-wounding in non-diabetic mice. (B) Quantification of relative wound area.
